# Supplementary material for: Transcriptomic Analyses Reveals Molecular Regulation of Photosynthesis by Epichloë endophyte in Achnatherum inebrians under Blumeria graminis Infection
Source: MDPI journal article supplement (doi:10.3390/jof8111201), 2022-11-14
Supplement: s1 [file s1]

## Supplementary Materials

### 1. Plant Growth and Biomass

**Table S1.** Two-way ANOVA for the effects of *Blumeria graminis* (P) and *Epichloë* endophyte (E) on plant height, tiller number, dry weight, and fresh weight of *Achnatherum inebrians*.

| Treatments | df | Plant heights |              | Tiller number |       | Dry weight |              | Fresh weight |              |
|------------|----|---------------|--------------|---------------|-------|------------|--------------|--------------|--------------|
|            |    | F             | P            | F             | P     | F          | P            | F            | P            |
| P          | 1  | 11.984        | <b>0.009</b> | 4.052         | 0.079 | 18.391     | <b>0.000</b> | 61.607       | <b>0.000</b> |
| E          | 1  | 39.271        | <b>0.000</b> | 0.122         | 0.736 | 12.660     | <b>0.007</b> | 18.035       | <b>0.003</b> |
| P*E        | 1  | 6.417         | <b>0.035</b> | 0.092         | 0.770 | 3.235      | 0.232        | 0.087        | 0.643        |

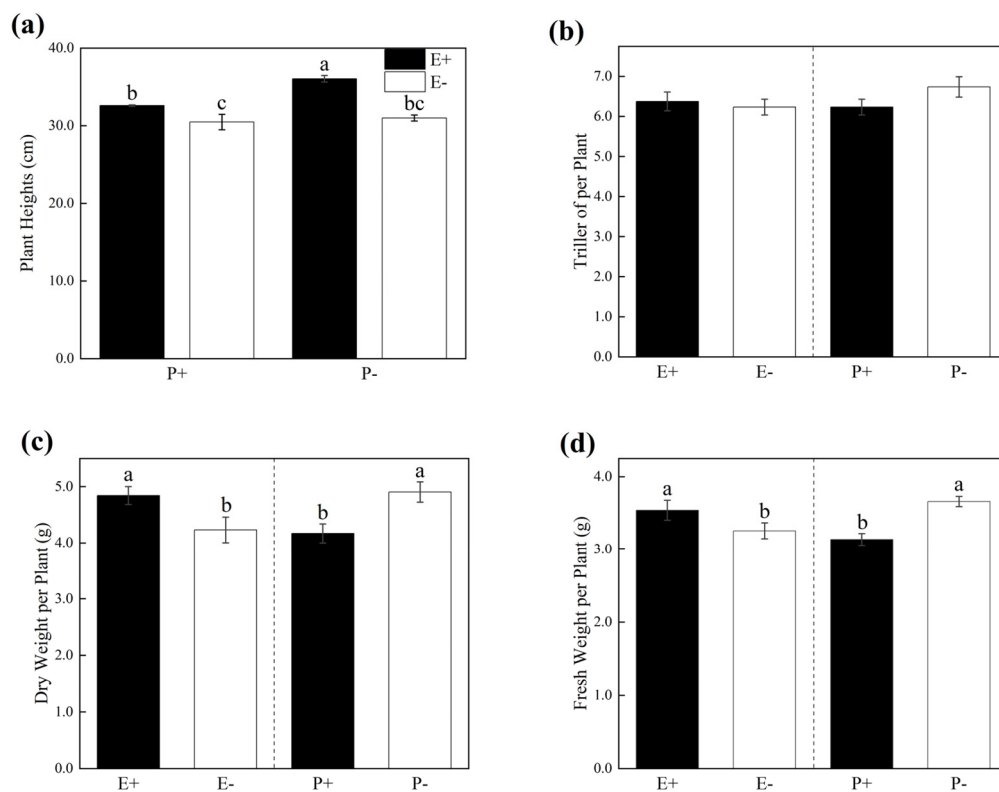

**Figure S1:** Effects of *Epichloë* endophyte-infected (E+) and *Epichloë* endophyte-free (E-) on plant height (a), tiller number (b), dry weight (c) and fresh weight (d) under the pathogen-inoculated (P+) and non-inoculated (P-). Values are mean±standard error (SE), with bars indicating SE. Columns with non-matching letters indicate a significant difference at  $p < 0.05$ .

## 2. Differentially expressed gene (DEG) analysis

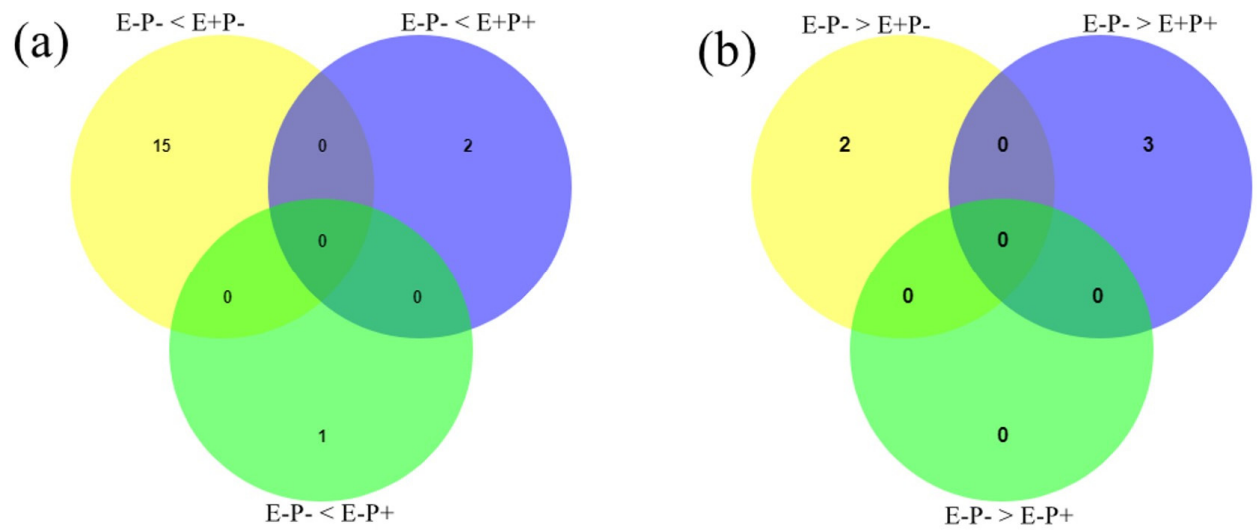

**Figure S2:** Number of up-regulated (a) and down-regulated (b) plant genes associated with defense responses given the presence of *Epichloë*-infected (E+), the pathogen *Blumeria graminis* (P+) and both fungi (E+P+) on *Achnatherum inebrians* plants. E-: *Epichloë*-free, P-: non-inoculated.

**Table S2:** Selected unigenes associated with processes of photosynthesis and photosynthesis-antenna proteins identified in the RNA-seq analysis in the present study.

| ID                 | Primers (5'-3')         |                         |
|--------------------|-------------------------|-------------------------|
|                    | Forward                 | Reverse                 |
| BMK_Unigene_091050 | TCCTCCTCCCCTCCACCACTAA  | GCGCGCTCTTAGCGATTGGCCG  |
| BMK_Unigene_005773 | CCACCACCACCACCACCACCAC  | CGCCGCCGCCAGACCGGGGCCC  |
| BMK_Unigene_042588 | GGCCTCACCGAACTTGACGCCG  | GGGGGGAGAGGCGGAGCAGGCG  |
| BMK_Unigene_082935 | GTACGATTACTGATATCGACCA  | TGAGACGCTTGGGTGAGGTTCTG |
| BMK_Unigene_076938 | AGGTAGCTCGGGGGCTCACCGG  | ACACGGGACACCTCCAGTCTTA  |
| BMK_Unigene_007228 | ATACTGTCTCATCTCTTATTTT  | TGGGGCACGGGTTGCACGGTAG  |
| BMK_Unigene_075981 | ACGGCCTCGCCGAACCTTGACGC | GTGATGTGTCCCTCTCCGAAC   |
| BMK_Unigene_085455 | TCATGACAACAGTTTAAATTAG  | CGATGATGGCCTCAGCGATTAG  |
| BMK_Unigene_011927 | GATCAAAACCCCTCTCCCCCCC  | CTACAGAACATGTCACTTTCTG  |
| BMK_Unigene_085681 | AAGGAGATCAAGAACGGCCGCC  | GTGATTGAAGCCCAGATCCGTG  |
| BMK_Unigene_106981 | GGTGAAGGAGATCAAGAACGGC  | GCTCCACCCATGTTATAAAGAA  |
| BMK_Unigene_012516 | GGCAGTAATAGTTGGTCAGACT  | CTGTTTTGTTCCACACTGCCAG  |
| BMK_Unigene_065380 | GGTGTCCCACCCGTAGTCACCG  | GGCTGGTGTTC AAGTCCCCGCG |
| BMK_Unigene_081965 | GAGAGTGAAATATGGAGAGTCT  | ATGTGGATAACCTCCACTGTCTG |
| BMK_Unigene_103428 | GCCGGTAGCAAAGGTGGGTTAT  | TTAGTATTTAGTTAGGTATTTG  |
| BMK_Unigene_104654 | TTTATCTGATTAGAGCGGAAAG  | TTCTCTATCTAGAAGTGGAATA  |
| BMK_Unigene_006566 | GGAACCTCAAGCCTCACTCTCGG | ACTGCGTGCCTTGCAATTGCAAC |
| BMK_Unigene_088235 | TTTGCTCTGAAATTTCCGGATA  | CTTGAGCACGGCCGCGGAGGCG  |
| BMK_Unigene_065041 | CTCGAGAACCTCGCTGACCACA  | CATTCTCCTGCGAGTACTCTCA  |
| BMK_Unigene_000884 | GCAAAAGATCAGTTTTTTCCAC  | GTGGACGAGGCTGGGGTTGCCT  |
| BMK_Unigene_080709 | GTTACAGAATAAGTGTTGATCG  | ACGTGGACGTCCCCCAAAGAGC  |
| BMK_Unigene_063512 | GCTGGACCCAAAGTATTCTGTT  | TCACTCTTCCTCTAGTTGTCAG  |

**Table S3:** Effect size of net photosynthetic efficiency (NPE) of different grasses under *Epichloë* endophyte infestation.

| Name                          | Effect size | 95% confidence intervals (95% CI) |
|-------------------------------|-------------|-----------------------------------|
| Mean                          | 0.0760      | 0.0319 to 0.1200                  |
| <i>Stipa purpurea</i>         | -0.0183     | -0.2267 to 0.1901                 |
| <i>Lolium perenne</i>         | 0.2018      | 0.0866 to 0.317                   |
| <i>Festuca sinensis</i>       | 0.3293      | 0.1186 to 0.5399                  |
| <i>Festuca arizonica</i>      | -0.25       | -0.3824 to -0.1177                |
| <i>Elymus tangutorum</i>      | 0.25        | 0.0429 to 0.4570                  |
| <i>Festuca arundinacea</i>    | 0.0589      | -1.7008 to 1.8186                 |
| <i>Calamagrostis epigeios</i> | 0.107       | -0.2372 to 0.4512                 |
| <i>Achnatherum sibiricum</i>  | -0.0229     | -0.1359 to 0.09                   |
| <i>Achnatherum inebrians</i>  | 0.1801      | 0.0614 to 0.2989                  |
| <i>Hordeum brevisubulatum</i> | 0.0761      | -0.1676 to 0.3197                 |

**Table S4:** Effect size of net photosynthetic efficiency (NPE) of *Epichloë*-infected (E+) and *Epichloë*-free (E-) grasses under pathogenic fungi inoculation.

| Treatment | Effect size | 95% confidence intervals (95% CI) |
|-----------|-------------|-----------------------------------|
| Mean      | -0.2246     | -0.2514 to -0.1978                |
| E-        | -0.2434     | -0.2942 to -0.1926                |
| E+        | -0.1575     | -0.2534 to -0.0616                |

## Supplementary for Material and Methods

### Meta-analysis

#### Reference:

- [1] Bao, G. S. Effect of the hemiparasitic plant *Pedicularis kansuensis* on growth and photosynthetic properties of *Stipa purpurea*-*Epichloë* symbiosis. Lanzhou: Lanzhou University, 2015.
- [2] Bao, G. S., Song, M. L., Wang, Y. Q., Li, C. J. Effects of parasitic *Artemisia annua* from Gansu on the photosynthetic characteristics of endophytic fungal symbiont in grasses. *Acta Microbiol Sinica*. 2020, 60, 294-305.
- [3] Bao, G.S. Study of *Epichloë* endophyte-grass symbionts on photosynthetic characteristics of hemiparasitic plant. *Chinese Qinghai Journal of Animal and Veterinary Sciences*. 2020, 50, 1-7.
- [4] Cao, Y. Effect of interaction between jasmonic acid and endophytic fungi on wild barley under salt stress. Lanzhou: Lanzhou University, 2018.
- [5] Chen, T. X., Johnson, R., Chen, S. H., and Li, C. J. Infection by the fungal endophyte *Epichloë bromicola* enhances the tolerance of wild barley (*Hordeum brevisubulatum*) to salt and alkali stresses. *Plant Soil* 2018, 428, 353-370.
- [6] Cui, X. L., Xia, C. Effect of exogenous abscisic acid on seedling establishment of *Epichloë gansuensis*-*Achnatherum inebrians* symbiont. *Acta Prataculture Sinica*. 2020, 29, 70-80.
- [7] Deng, J. Mechanisms of the effects of arbuscular mycorrhizal fungus and grass endophyte on leaf spot of perennial ryegrass. Lanzhou: Lanzhou University, 2021.
- [8] Deng, J., Li, F., Duan, T. Y. Effects of AM fungus and grass endophyte on the infection of *Lolium perenne* by the pathogen *Biopolaris sorokinianum* in a greenhouse. *Acta Prataculture Sinica*. 2019, 28, 103-113.
- [9] Du, Y. J. Stress resistance research of endophyte in wild *Festuca L* and their association. Beijing: Beijing Forestry University, 2010.
- [10] Du, Y. J., Sun, X. B., Han, L. B. Effect of *Neotyphodium starrii* infected on photosynthetic and morphological characteristics of tall fescue under high

temperature. Journal of Central South University of Forestry and Technology. 2010, 30, 41-47.

[11] Du, Y. J., Wang, Q., Han, L. B. Endophytic fungus *Neotyphodium typhinum* infection effects on photosynthetic characteristics of tall fescue. Ecol. Environ. Sci. 2009, 18, 45-47.

[12] Fang, A. G. Effect of *Neotyphodium* endophyte and AM fungi on growth of *Hordeum brevisubulatum* under salt and phosphorus stress conditions. Lanzhou: Lanzhou University, 2013.

[13] Guo, Y. E. Effect of phosphorus, *Claroideoglomus etunicatum* and grass endophyte on perennial ryegrass leaf spot disease caused by *Bipolaris zeae*. Lanzhou: Lanzhou University, 2018.

[14] Guo, Y. E., Gao, P., Li, F. Effects of AM fungi and grass endophytes on perennial ryegrass *Bipolaris sorokiniana* leaf spot disease under limited soil nutrients. Eur. J. Plant Path. 2019, 154, 659-671.

[15] Guo, Y. E., Li, F., Wang, X. Y., Wang, Z. G., Duan, T. Y. Effects of phosphorus, AM fungi and grass endophytes on leaf spot of perennial ryegrass. Cao Xue. 2018, 4, 17-26, 72.

[16] Guo, Y. E., Li, Y. D., Gao, P., Wang, Z. G., Duan, T. Y. Effects of *Claroideoglomus etunicatum* and grass endophyte on the growth of *Lolium perenne* under different phosphorus levels. Acta Prataculture Sinica. 2018, 26, 1458-1466.

[17] Han, R., Li, X., Ren, A. Z., Gao, Y. B. Physiological ecological effect of endophyte infection on *Achnatherum sibiricum* under drought stress. Acta. Ecol. Sinica. 2011, 31, 2115-2123.

[18] Jia, T. Effect of endophytic species, host genotype and water/nutrient supply on the performance of grass-endophyte symbionts. Tianjing: Nankai University, 2014.

[19] Jia, T., Ren, A. Z., Gao, Y. B. Host genotype overrides endophyte infection effects on growth, physiology, and nutrient content of a native grass, *Achnatherum sibiricum*. Plant Ecol. 2014, 215, 875-887.

- [20] Jia, T., Ren, A. Z., Wang, S., Gao, Y. B. Effect of Endophytic fungi on growth and photosynthetic characteristics of *Achnatherum sibiricum*. Acta. Ecol. Sinica. 2011, 31, 4811-4817.
- [21] Li, C., Li, X., Ren, A. Z., Gao, Y. B. Effect of endophyte infection on Zn resistance of *Achnatherum sibiricum*. Acta Scientiarum Naturalium Universitatis Nankaiensis. 2013, 46, 29-35.
- [22] Li, C., Ren, A. Z., Gao, Y. B. Effect of endophyte infection on Zn resistance of tall fescue. Acta. Ecol. Sinica. 2010, 30, 1684-1690.
- [23] Li, F., Deng, J., Nzabanita, C. Growth and physiological responses of perennial ryegrass to an AMF and an *Epichloë* endophyte under different soil water contents. Symbiosis 2019, 79, 151-161.
- [24] Li, F., Li, Y. Z., Duan, T. Y. Effects of interactions between a grass endophyte and an arbuscular mycorrhizal fungus on perennial ryegrass growth. Acta Prataculturae Sinica. 2017, 26, 132-140.
- [25] Li, M. M. Effect of *Epichloë* endophyte on drought resistance of different ecotypes *Festuca sinensis*. Lanzhou: Lanzhou University, 2019.
- [26] Li, N. N. Effect of interaction of endophyte and *Blumeria graminis* on the *Achnatherum inebrians* in different water conditions. Lanzhou: Lanzhou University, 2018.
- [27] Li, X., Zhou, Y., Mace, W., Qin, J., Liu, H., Chen, W., Ren, A. Z., Gao, Y. B. Endophyte species influence the biomass production of the native grass *Achnatherum sibiricum* (L.) Keng under high nitrogen availability. Ecol. Evol. 2016, 6, 8595-8606.
- [28] Liang, Y., Gao, Y. B., Chen, S. P., Ren, A. Z. Effects of endophyte infection on photosynthesis, transpiration and water use efficiency of *Lolium perenne* L. under drought stress. Acta Phytoecologica Sinica. 2001, 5, 537-543.
- [29] Lin, F., Li, C., Zhang, X. Bao, X. Y., Ren, A. Z., Gao, Y. B. Effect of endophytic fungi on photosynthetic characteristics of three *Achnatherum sibiricum* populations in Inner Mongolia Steppe. Bull. Botanical. Res. 2009, 29, 61-68.



- [30] Liu, B. H. Biological properties of endophytes/*Calamagrostis* symbiota. Nanjing: Nanjing Agricultural University, 2012.
- [31] Liu, L. Response of *Epichloë gansuensis*-*Achnatherum inebrians* symbiont on stresses of cold and powdery mildew disease treated by SA and ABA. Lanzhou: Lanzhou University, 2016.
- [32] Ma, M. Z. Disease resistance of perennial ryegrass (*Lolium perenne*)-*Epichloë festucae* var. *lolii* endophyte symbiont and their resistance mechanism to *Bipolaris sorokiniana*. Lanzhou: Lanzhou University, 2015.
- [33] Ma, M. Z., Nan, Z. B. Effect of fungal endophytes against rust disease of perennial ryegrass (*Lolium perenne*) on growth and physiological indices. Acta Praticulturae Sinica. 2011, 20, 150-156.
- [34] Morse, L. J., Day, T. A., Faeth, S. H. Effect of *Neotyphodium* endophyte infection on growth and leaf gas exchange of *Arizona fescue* under contrasting water availability regimes. Environ. Exp. Bot. 2002, 48, 257-268.
- [35] Qin, J. H., Lu, Y., Li, Z., Zhou, Y., Ren, A. Z., Gao, Y. B. Effects of methyl jasmonate treatments and endophyte infection on growth of *Achnatherum sibiricum*. Chinese. J. Appl. Ecol. 2015, 26, 1145-1152.
- [36] Rozpądek, P., Wężowicz, K., Nosek, M., Ważny, R., Tokarz, K., Lembicz, M., Miszański, Z., Turnau, K. The fungal endophyte *Epichloë typhina* improves photosynthesis efficiency of its host orchard grass (*Dactylis glomerata*). Planta 2015, 242, 1025-35.
- [37] Shi, Z. B., Zhou, Y., Li, X., Ren, A. Z., Gao, Y. B. Physioecological effects of endophyte infection on the host grass with elevated CO<sub>2</sub>. Acta. Ecol. Sinica. 2013, 33, 6135-6141.
- [38] Wang, J. F., Tian, P., Christensen, M. J., Nan, Z. B. Effect of *Epichloë gansuensis* endophyte on the activity of enzymes of nitrogen metabolism, nitrogen use efficiency and photosynthetic ability of *Achnatherum inebrians* under various NaCl concentrations. Plant Soil 2019, 435, 57-68.

- [39] Wang, J. L., Gao, Y. B., Ren, A. Z., Wang, W., Zhao, N. X. Effects of endophyte infection on photosynthesis, transpiration and biomass of *Lolium perenne* L. at different nitrogen levels. Chinese Bull. Bot. 2004, 5, 539-546.
- [40] Xia, C. Responses of *Epichloë gansuensis*-*Achnatherum inebrians* symbiont to drought stress. Lanzhou:Lanzhou University, 2018.
- [41] Xia, C., Christensen, M. J., Zhang, X. X., Nan, Z. B. Effect of *Epichloë gansuensis* endophyte and transgenerational effects on the water use efficiency, nutrient and biomass accumulation of *Achnatherum inebrians* under soil water deficit. Plant Soil 2018, 424, 555-571.
- [42] Xia, C., Li, N. N., Zhang, X. X., Feng, Y., Christensen, M. J., Nan, Z. B. An *Epichloë* endophyte improves photosynthetic ability and dry matter production of its host *Achnatherum inebrians* infected by *Blumeria graminis* under various soil water conditions. Fungal Ecol. 2016, 22, 26-34.
- [43] Yan, Z. C., Li, Y. D., Cheng, W. J., Gao, P., Guo, Y., Duan, T. Y. Effects of AM fungi and grass endophyte on the growth of ryegrass under different salt concentrations. Grassland. Turf. 2018, 38, 63-70.
- [44] Zhang, H. J. The effect of pathogenic ergot bacteria on the *Epichloë* endophyte symbionts of *Achnatherum sibiricum*. Lanzhou:Lanzhou University, 2021.
- [45] Zhang, H. J., Li, X., White, J.F. *Epichloë* endophyte improves ergot disease resistance of host (*Achnatherum inebrians*) by regulating leaf senescence and photosynthetic capacity. Plant Growth Regul. 2022, 41, 808-817.
- [46] Zhang, J. F. Effect of fungal endophyte on intraspecific competition of *Elymus nutans* under water stress. Lanzhou:Lanzhou University, 2013.
